# Supplementary material for: Chemoenzymatic synthesis of enantiopure hydroxy sulfoxides derived from substituted arenes
Source: Royal Society of Chemistry journal article supplement (doi:10.1039/c5ob02411k), 2016-01-01
Supplement: c5ob02411k1.pdf [file c5ob02411k1.pdf]

## Electronic supplementary information (ESI)

Chemoenzymatic synthesis of enantiopure hydroxy sulfoxides derived from substituted arenes

Derek R. Boyd, Narain D. Sharma, John F. Malone, Vera Ljubez, Deirdre Murphy, Steven D. Shepherd and Christopher C. R. Allen

### NMR spectra

**6**<sub>1S,2S</sub>

**7**<sub>1S,2S,R'</sub>

**8**<sub>1S,2S,S'</sub>

**9**<sub>1S,2R</sub>

**10**<sub>1S,2R,S'</sub>

**11**<sub>1S,2R,R'</sub>

**12**<sub>1S,3S</sub>

**13**<sub>1S,3S,R'</sub>

**14**<sub>1S,3S,S'</sub>

**16**<sub>1S,2R,3R</sub>

**17**<sub>1S,2R,3R,R'</sub>

**26a**<sub>R</sub>

**26b**<sub>R</sub>

**27b**<sub>R</sub>

**29a**<sub>R</sub>

### ECD Spectra

**7**<sub>1S,2S,R'</sub> / **8**<sub>1S,2S,S'</sub>

**10**<sub>1S,2R,S'</sub> / **11**<sub>1S,2R,R'</sub>

**13**<sub>1S,3S,R'</sub> / **14**<sub>1S,3S,S'</sub>

**27a**<sub>R</sub>

**27b**<sub>R</sub>

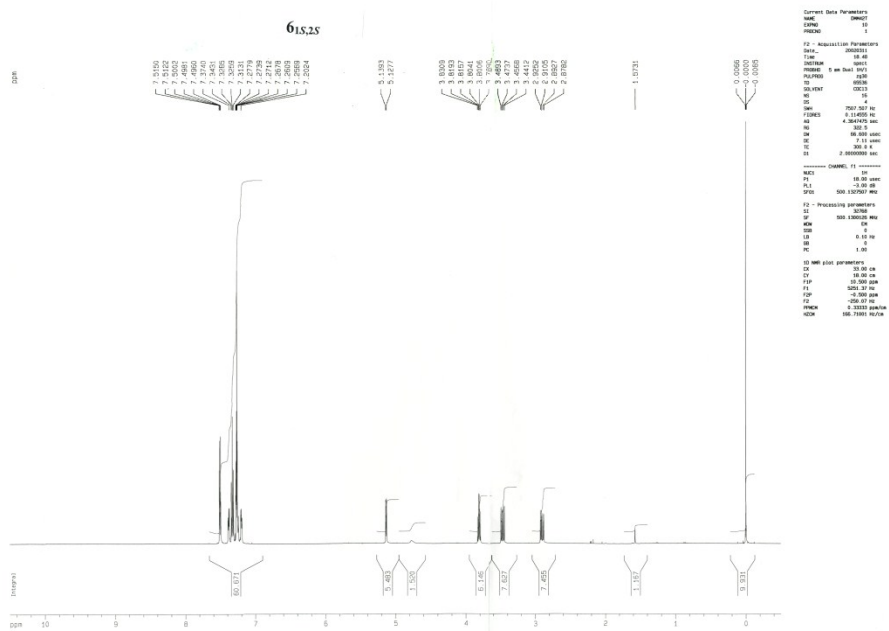

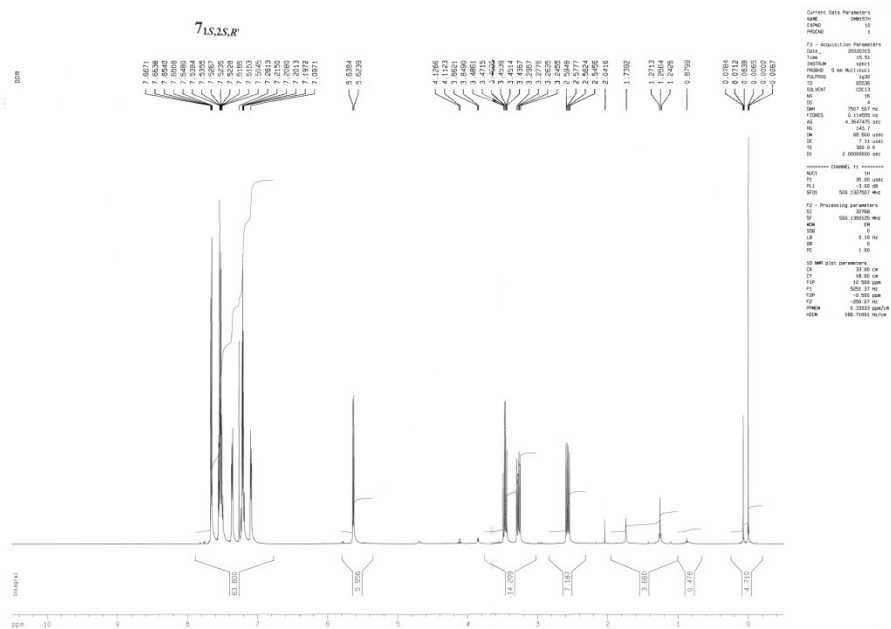

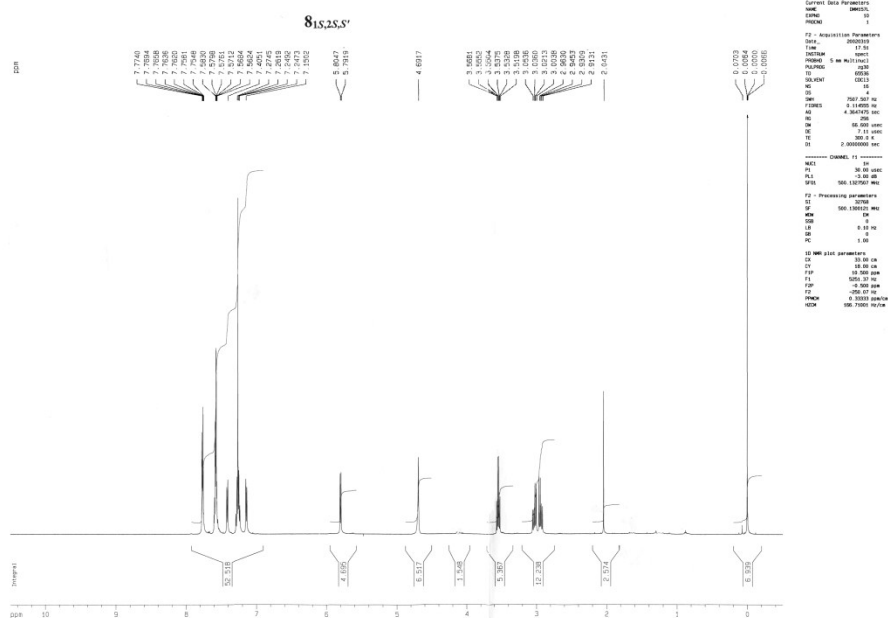

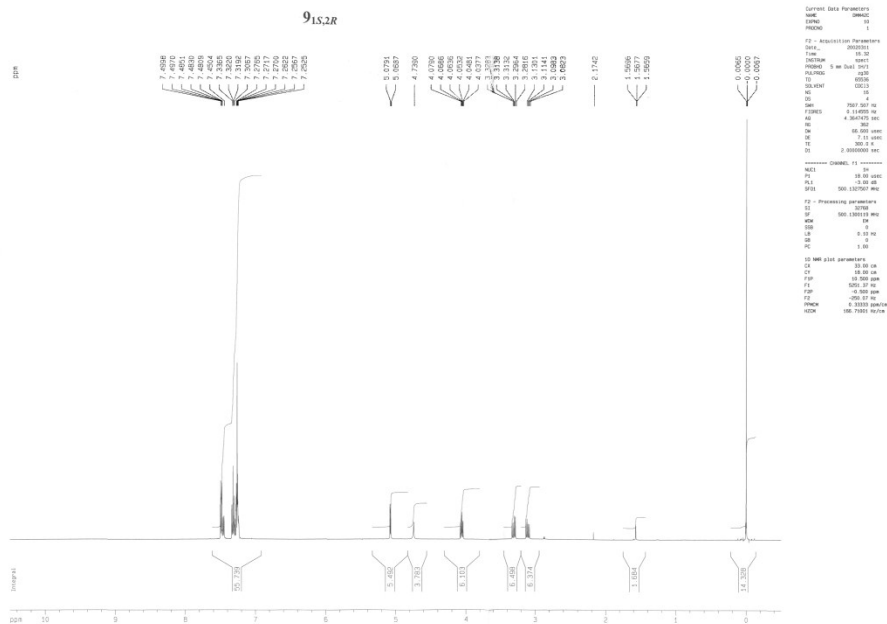

$10_{1S,2R,S}$ 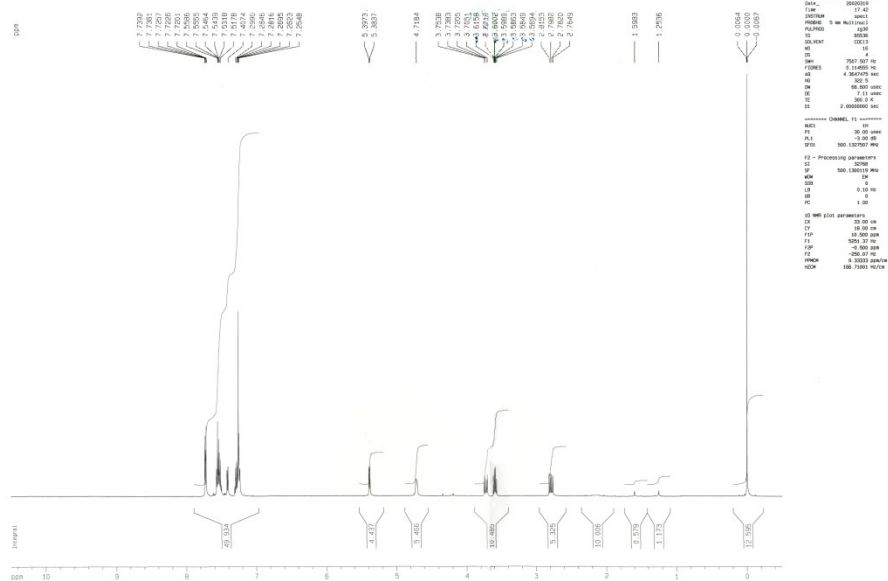

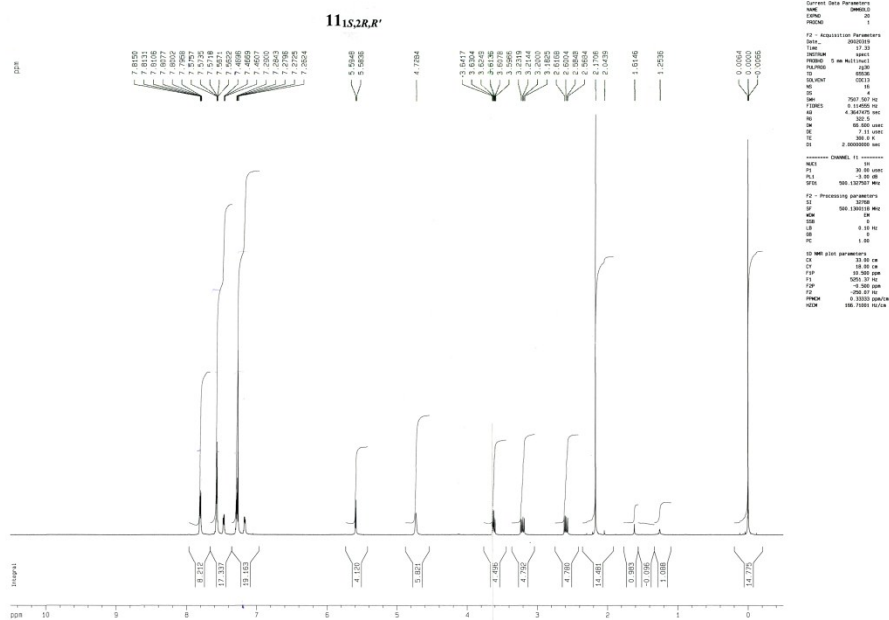

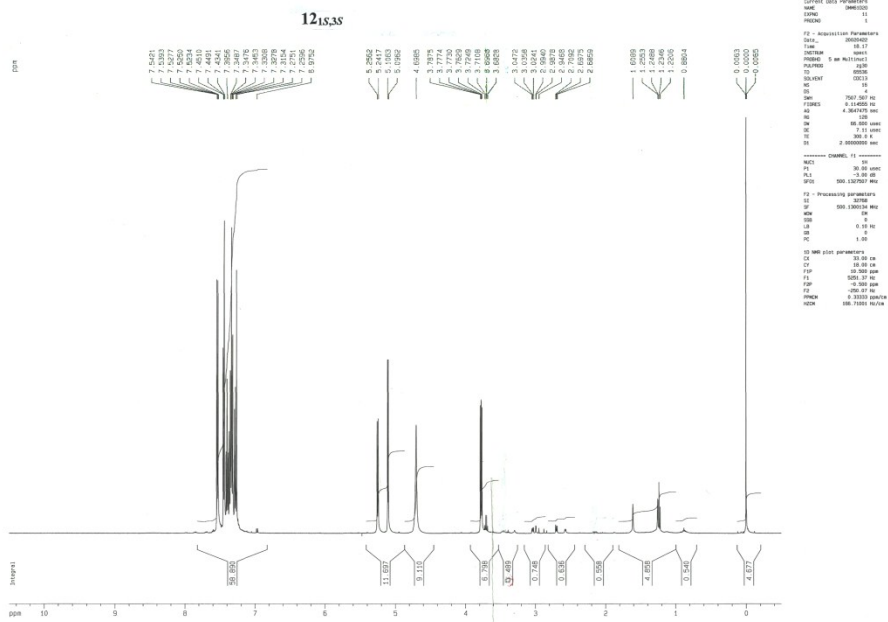



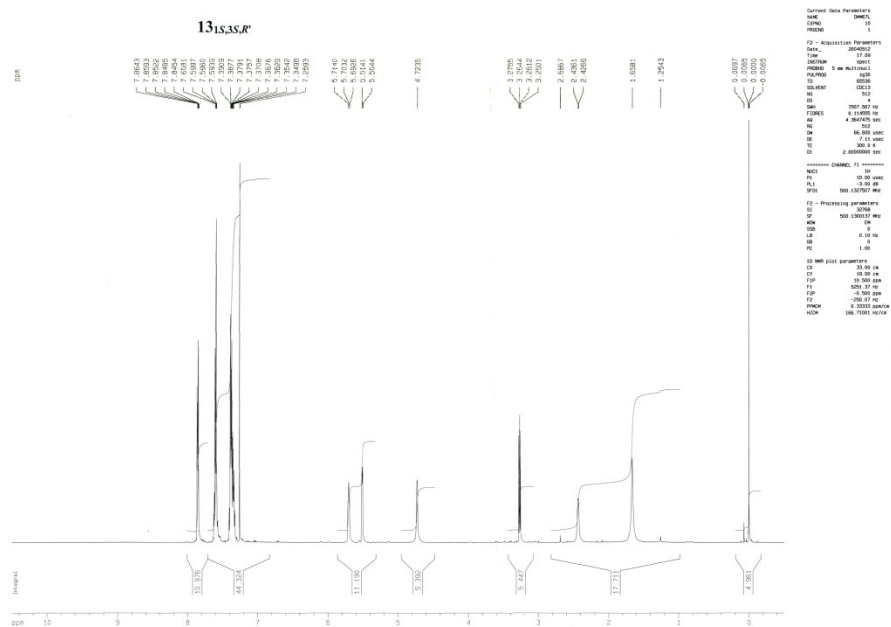

$14_{1S,3S,S}$ 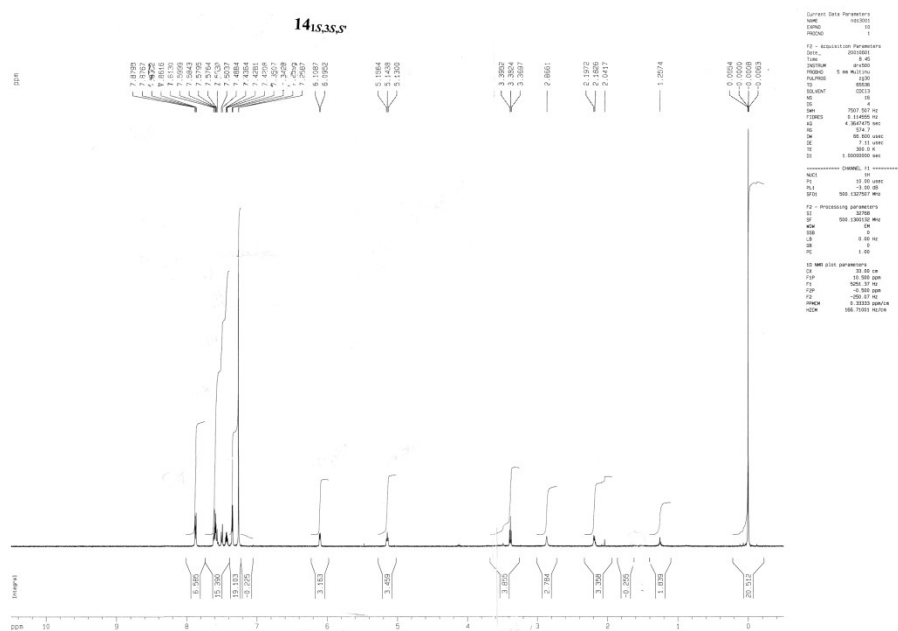

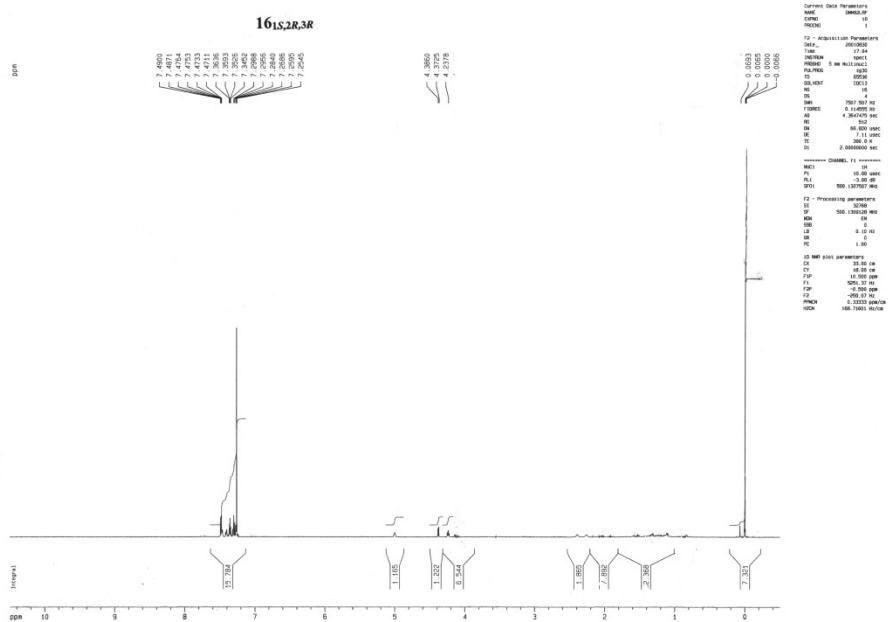

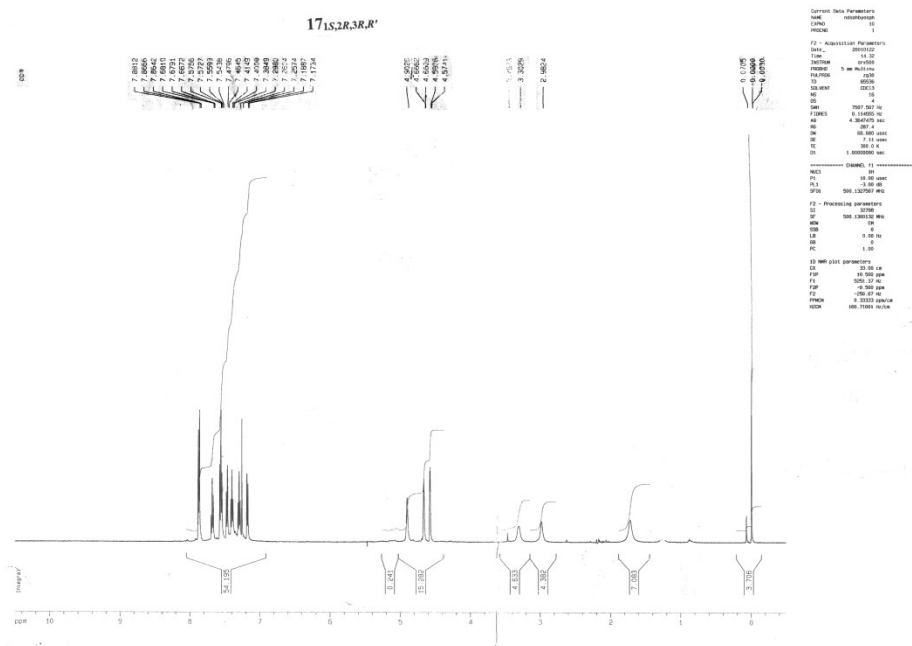

Figure 1 consists of seven sub-diagrams labeled (a) through (g), illustrating the structural evolution of a bridge. Each diagram shows a horizontal beam with various support and cable configurations. (a) shows a single support at the left end. (b) shows two supports, one at each end. (c) through (g) show increasing numbers of cables (1, 2, 4, 8, 16) being added between the beam and a central or side support, representing the development of a cable-stayed bridge.

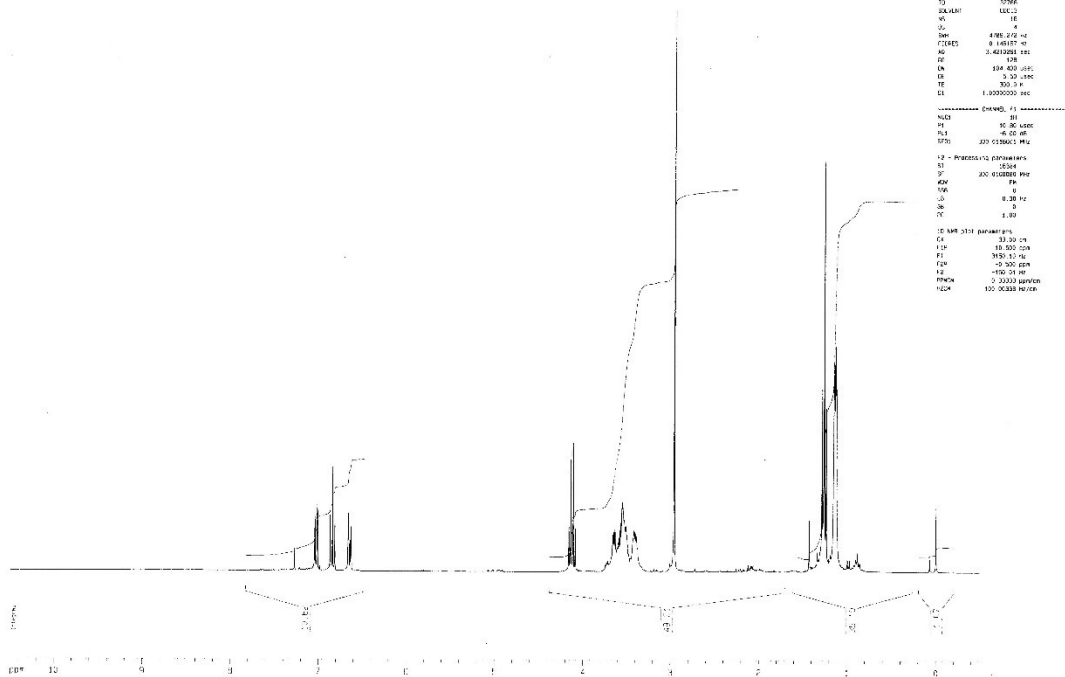

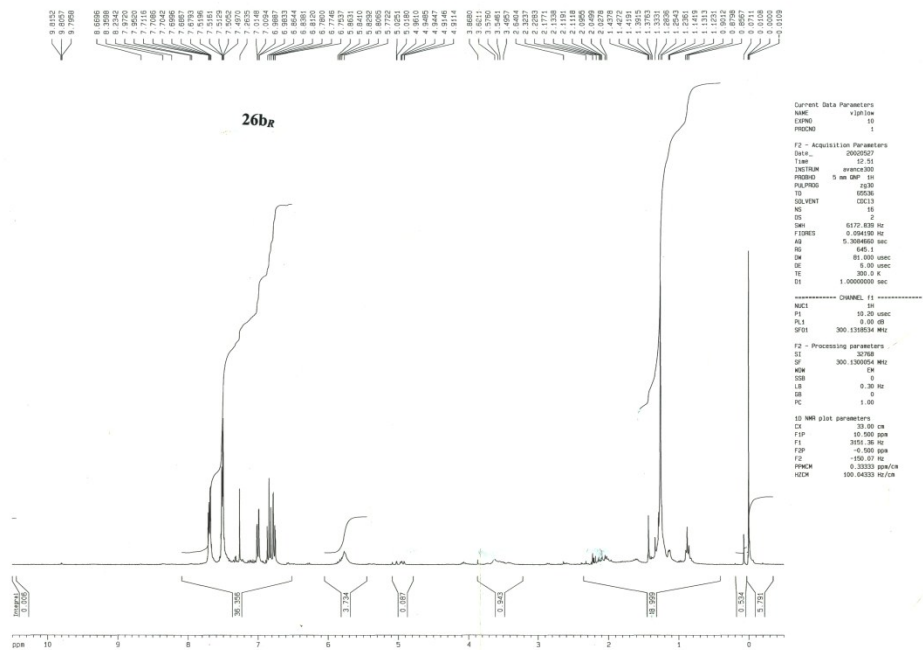

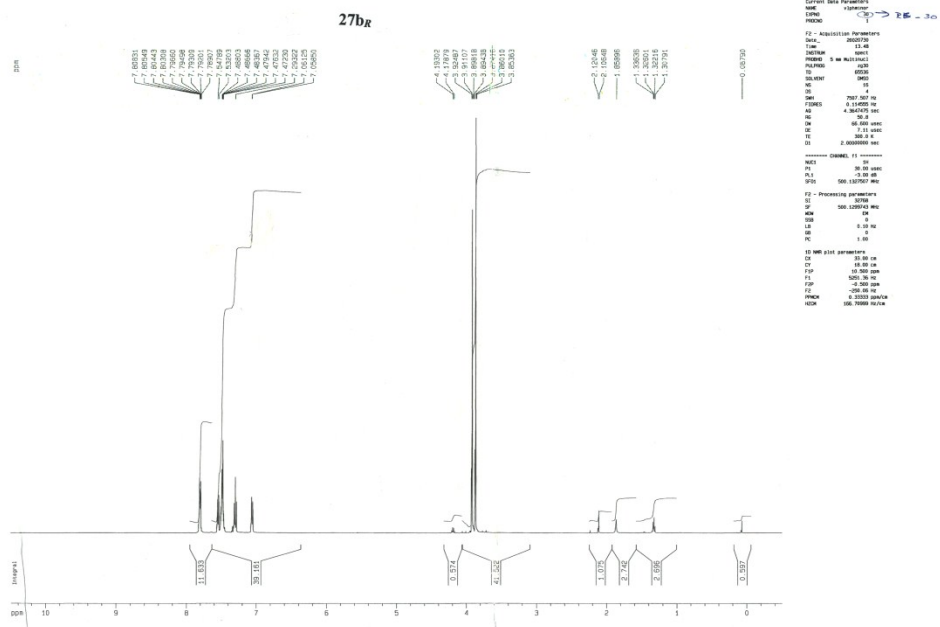





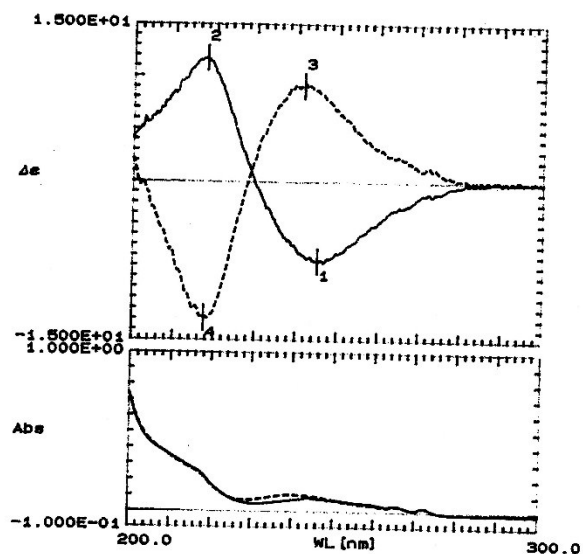

| No. | Wavelength | Value      |          |
|-----|------------|------------|----------|
| 1   | 245.20 nm  | -7.508E+00 | 81S2S,S' |
| 2   | 217.80 nm  | 1.174E+01  |          |
| 3   | 241.60 nm  | 9.145E+00  | 71S2S,R' |
| 4   | 217.60 nm  | -1.291E+01 |          |

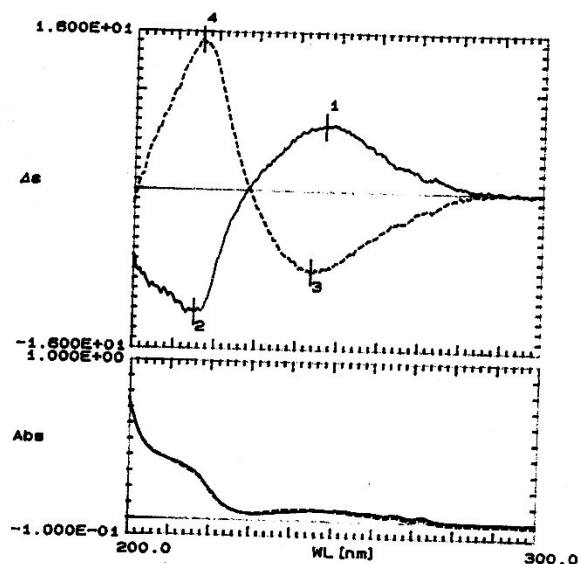

| No. | Wavelength | Value      |
|-----|------------|------------|
| 1   | 246.60 nm  | 6.532E+00  |
| 2   | 215.20 nm  | -1.235E+01 |
| 3   | 243.60 nm  | -8.154E+00 |
| 4   | 216.20 nm  | 1.518E+01  |

11IS2R.R'

10IS2R.S'

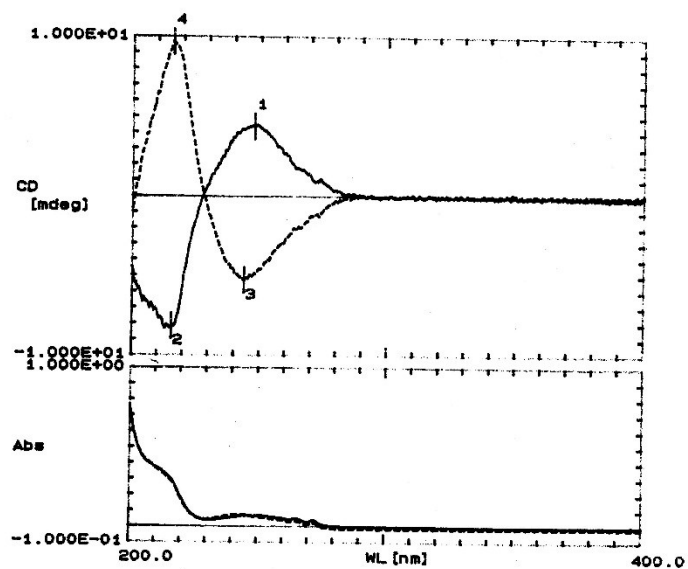

| No. | Wavelength | Value      |
|-----|------------|------------|
| 1   | 247.80 nm  | 4.402E+00  |
| 2   | 215.80 nm  | -8.156E+00 |
| 3   | 244.00 nm  | -5.284E+00 |
| 4   | 216.00 nm  | 9.671E+00  |

131S3S.R  
141S3S.S'

27a<sub>R</sub>

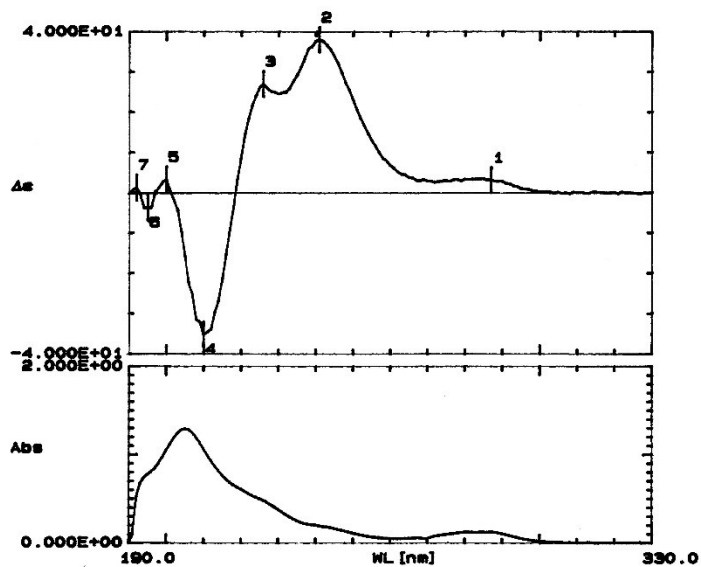

| No. | Wavelength | Value      |
|-----|------------|------------|
| 1   | 287.00 nm  | 3.152E+00  |
| 2   | 241.00 nm  | 3.80E+01   |
| 3   | 226.00 nm  | 2.711E+01  |
| 4   | 210.00 nm  | -3.514E+01 |
| 5   | 200.00 nm  | 3.305E+00  |
| 6   | 195.00 nm  | -3.717E+00 |
| 7   | 192.00 nm  | 1.30E+00   |

27br

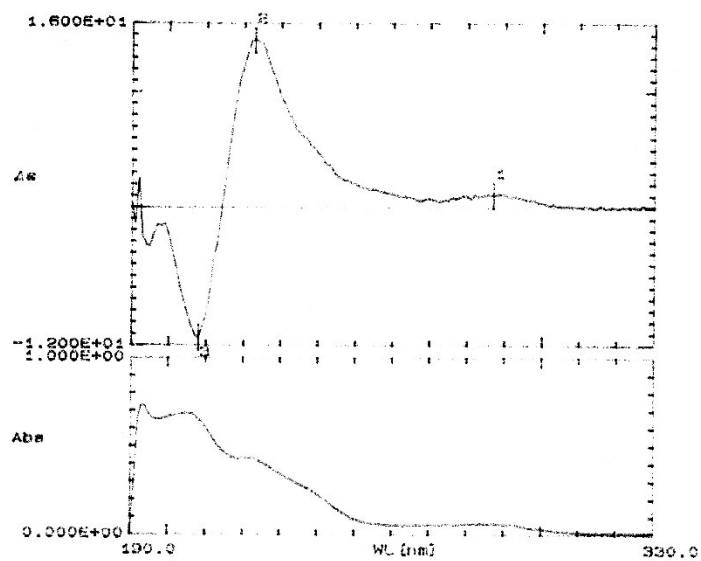

| Wavelength | Value      |
|------------|------------|
| 287.00 nm  | 1.020E+00  |
| 225.00 nm  | 1.452E+01  |
| 200.00 nm  | -1.135E+01 |
